# Supplementary material for: Integrating Machine Learning and Single-Cell Sequencing: Decoding Histone Deacetylase Genes-Based Diagnostic Features and Immune Cell Dynamics in Ischemic Stroke
Source: Research Square preprint supplement (doi:10.21203/rs.3.rs-7586916/v1), 2025-10-15
Supplement: Supplementary file 1 [file 0703f95b9ddabdff9b51ff40.docx]

**Supplementary Table 1 Datasets used in the present study**

**Supplementary Table 2 Primers used in the present study**
